# Supplementary material for: Expression of PD-1, PD-L1 and PD-L2 in Lymphomas in Patients with Pre-Existing Rheumatic Diseases—A Possible Association with High Rheumatoid Arthritis Disease Activity
Source: MDPI journal article supplement (doi:10.3390/cancers14061509), 2022-03-15
Supplement: s1 [file s1]

## Supplementary Materials:

# Expression of PD-1, PD-L1 and PD-L2 in Lymphomas in Patients with Pre-Existing Rheumatic Diseases – A Possible Association with High Rheumatoid Arthritis Disease Activity

Erik Hellbacher <sup>1,\*</sup>, Christer Sundström <sup>2</sup>, Daniel Molin <sup>3</sup>, Eva Baecklund <sup>1</sup> and Peter Hollander <sup>2</sup>

**Table S1.** DMARDs used in all RA-DLBCL patients at lymphoma diagnosis<sup>1</sup> and comparison between the highest RA disease activity group and the lower disease activity group.

|                           | Entire cohort | RA highest disease activity group | RA lower disease activity group | P-value * |
|---------------------------|---------------|-----------------------------------|---------------------------------|-----------|
| All patients              | 99 (100)      | 25 (100)                          | 74 (100)                        |           |
| Proreid (podophyllotoxin) | 6 (6)         | 0 (0)                             | 6 (8)                           | 0.33      |
| Antimalarials             | 4 (4)         | 3 (12)                            | 1 (1.5)                         | 0.049     |
| Sulfasalazine             | 4 (4)         | 1 (4)                             | 3 (4)                           | 1         |
| Methotrexate              | 3 (3)         | 1 (4)                             | 2 (3)                           | 1         |
| Chlorambucil              | 2 (2)         | 0 (0)                             | 2 (3)                           | 1         |
| Azathioprine              | 2 (2)         | 1 (4)                             | 1 (1.5)                         | 0.44      |
| Auranofin                 | 1 (1)         | 0 (0)                             | 1 (1.5)                         | 1         |
| Gold injection            | 1 (1)         | 0 (0)                             | 1 (1.5)                         | 1         |
| Penicillamine             | 1 (1)         | 0 (0)                             | 1 (1.5)                         | 1         |

DMARD, disease modifying anti-rheumatic drugs; RA, rheumatoid arthritis; DLBCL, diffuse large B-cell lymphoma. <sup>1</sup>Defined as the treatment at the time of lymphoma diagnosis provided it had been used for four or more consecutive weeks. \* According to Fischer's exact test.

**Table S2.** Comparison of median proportions of PD-L1+ tumor cells and TILs among the various lymphoma subtypes.

| Lymphoma subtype | Number of cases * | Median proportion of PD-L1+ tumor cells, (range) | Median proportion of PD-L1+ TILs, (range) |
|------------------|-------------------|--------------------------------------------------|-------------------------------------------|
| cHL              | 13                | 16.0 (0-75.7)                                    | 19.6 (0.3-63.1)                           |
| DLBCL            | 112               | 1.6 (0-85.1)                                     | 10.2 (0-89.3)                             |
| FL               | 32                | 0.0 (0-6.1)                                      | 7.4 (0.2-38.5)                            |
| CLL              | 13                | 0.0 (0-7.9)                                      | 1.4 (0.3-9.8)                             |
| LPL              | 3                 | 0.6 (0-46.2)                                     | 3.9 (0.7-53.2)                            |
| MZBL             | 5                 | 0.7 (0-6.5)                                      | 3.2 (0.4-17.5)                            |
| MCL              | 5                 | 0.0 (0-1.1)                                      | 4.3 (0.2-6.7)                             |
| Burkitt lymphoma | 3                 | 0.0 (0-0.2)                                      | 2.8 (2.0-3.8)                             |
| HGBCL            | 8                 | 4.3 (0-30.4)                                     | 5.6 (0.5-21.5)                            |
| LGBCL            | 6                 | 0.2 (0-13.0)                                     | 4.4 (1.5-2.7)                             |
| TCL              | 5                 | 4.2 (0-61.6)                                     | 2.8 (0-7.3)                               |

\* Number of cases with information enabling evaluation of PD-L1; cHL, classical Hodgkin lymphoma; DLBCL, diffuse large B-cell lymphoma; FL, follicular lymphoma; CLL, chronic lymphocytic leukemia; LPL, lymphoplasmacytic lymphoma; MZBL, marginal zone B-cell lymphoma; MCL, mantle cell lymphoma; HGBCL, high-grade B-cell lymphoma; LGBCL, low-grade B-cell lymphoma; TCL, T-cell lymphoma.

**Table S3.** Comparison of median proportions of PD-L2+ tumor cells and TILs among the various lymphoma subtypes.

| Lymphoma subtype | Number of cases * | Median proportion of PD-L2+ tumor cells, % (range) | Median proportion of PD-L2+ TILs, % (range) |
|------------------|-------------------|----------------------------------------------------|---------------------------------------------|
| cHL              | 13                | 0.0 (0-51.5)                                       | 0.3 (0-14.9)                                |
| DLBCL            | 112               | 0.0 (0-32.3)                                       | 0.6 (0-56.5)                                |
| FL               | 32                | 0.0 (0-42.7)                                       | 12.1 (0.2-49.4)                             |
| CLL              | 13                | 0.0 (0-0.4)                                        | 0.5 (0-3.2)                                 |
| LPL              | 3                 | 1.2 (0.2-16.8)                                     | 18.5 (2.6-34.0)                             |
| MZBL             | 5                 | 1.9 (0-3.8)                                        | 5.2 (0.4-15.6)                              |
| MCL              | 5                 | 0.1 (0-5.7)                                        | 0.8 (0.3-5.6)                               |
| Burkitt lymphoma | 3                 | 0.0 (0)                                            | 0.1 (0-0.2)                                 |
| HGBCL            | 8                 | 0.1 (0-1.0)                                        | 0.6 (0.2-7.1)                               |
| LGBCL            | 6                 | 0.0 (0-0.8)                                        | 0.8 (0.2-12.1)                              |
| TCL              | 5                 | 0.2 (0-10.5)                                       | 1.8 (0-30.3)                                |

\* Number of cases with information enabling evaluation of PD-L2; cHL, classical Hodgkin lymphoma; DLBCL, diffuse large B-cell lymphoma; FL, follicular lymphoma; CLL, chronic lymphocytic leukemia; LPL, lymphoplasmacytic lymphoma; MZBL, marginal zone B-cell lymphoma; MCL, mantle cell lymphoma; HGBCL, high-grade B-cell lymphoma; LGBCL, low-grade B-cell lymphoma; TCL, T-cell lymphoma.

**Table S4.** Comparison of median proportions of PD-1+ TILs among the various lymphoma subtypes.

| Lymphoma subtype | Number of cases * | Median number of PD-1+ TILs per HPF (range) |
|------------------|-------------------|---------------------------------------------|
| cHL              | 15                | 53.1 (0-296.9)                              |
| DLBCL            | 111               | 42.4 (0.4-560.9)                            |
| FL               | 29                | 236.3 (3.4-714.0)                           |
| CLL              | 13                | 56.6 (1.6-166.0)                            |
| LPL              | 4                 | 36.9 (13.7-124.2)                           |
| MZBL             | 5                 | 187.9 (183.8-611.6)                         |
| MCL              | 4                 | 30.6 (8.8-80.6)                             |
| Burkitt lymphoma | 3                 | 18.5 (1.5-123.3)                            |
| HGBCL            | 8                 | 28.6 (7.6-94.1)                             |
| LGBCL            | 6                 | 91.6 (3.2-513.6)                            |
| TCL              | 5                 | 9.9 (0-410.9)                               |

\* Number of cases with information enabling evaluation of PD-1; cHL, classical Hodgkin lymphoma; DLBCL, diffuse large B-cell lymphoma; FL, follicular lymphoma; CLL, chronic lymphocytic leukemia; LPL, lymphoplasmacytic lymphoma. MZBL, marginal zone B-cell lymphoma; MCL, mantle cell lymphoma; HGBCL, high-grade B-cell lymphoma; LGBCL, low-grade B-cell lymphoma; TCL, T-cell lymphoma.
